# Supplementary figures and images for: A Double-Blind Randomized Controlled Trial of N -Acetylcysteine in Cannabis-Dependent Adolescents
Source: Atypon-hosted journal article supplement (doi:10.1176/appi.ajp.2012.12010055), 2012-06-17

**Supplemental Figure 1.** Recruitment flowchart

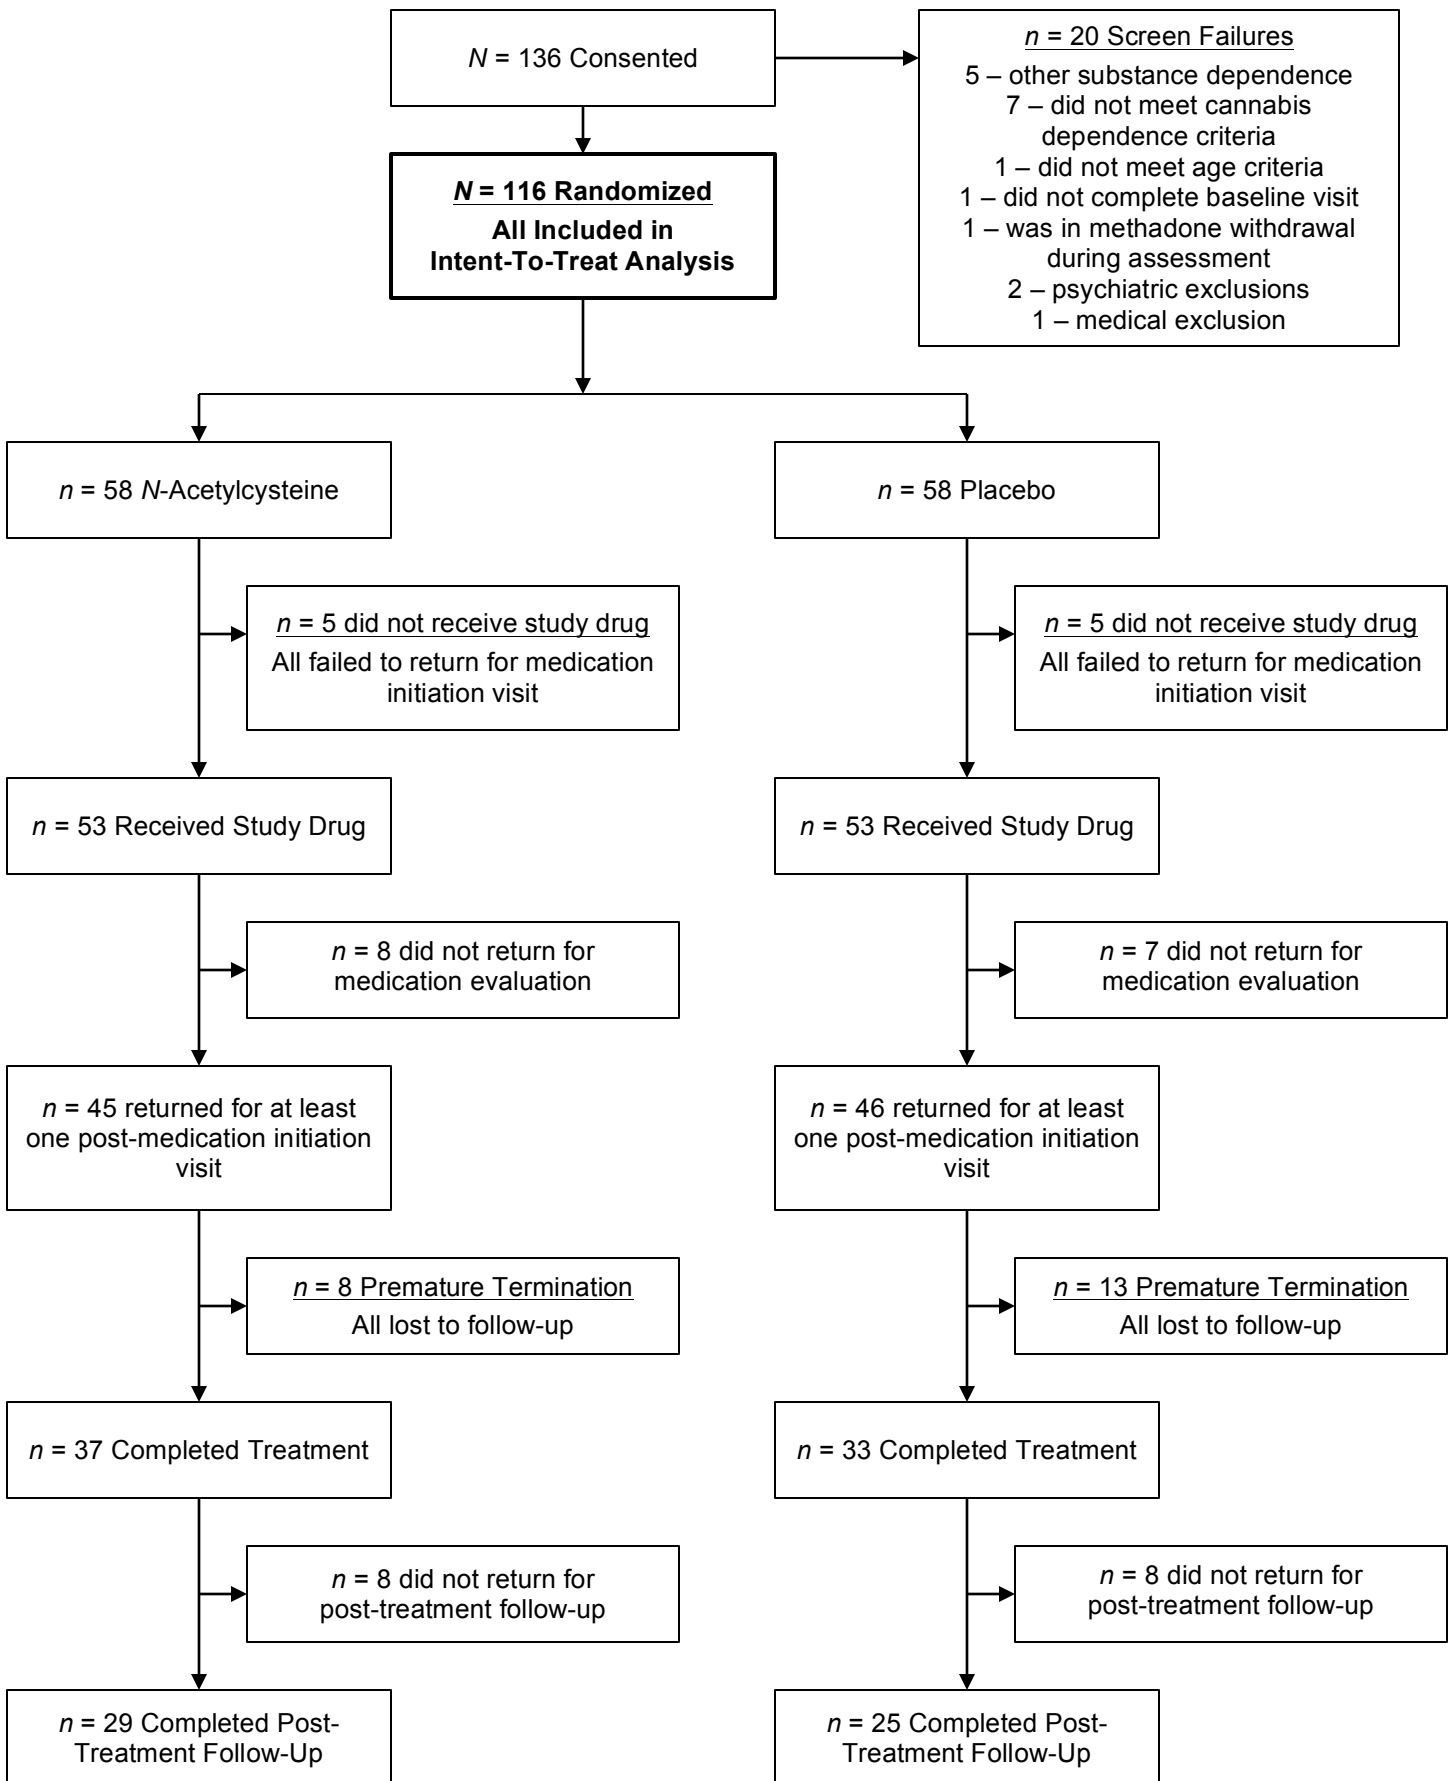

Supplement: appi.ajp.2012.12010055.ds001.pdf [file appi.ajp.2012.12010055.ds001.pdf]
